# Supplementary material
Source: publisher site journal article supplement (https://www.dovepress.com/article/606744)
Supplement: Supplementary file 1 [file 606744_Supplementary%20Table_1%20%25282%2529.pdf]

**Supplementary Table 1: Primary Antibodies Used for Western Blotting**

| Antigen name | Abbreviation | Dilution | Catalog Number | Manufacturers |
| --- | --- | --- | --- | --- |
| Nuclear factor erythroid 2-related factor 2 | Nrf2 | 1:1,000 | #HA721432 | HUABIO |
| Heme oxygenase 1 | HO-1 | 1:1,000 | #HA721854 | HUABIO |
| NAD(P)H: quinone oxidoreductase 1 | NQO1 | 1:1,000 | #ET1702-50 | HUABIO |
| Vascular endothelial growth factor | VEGF | 1:1,000 | #ET1604-28 | HUABIO |
| Basic fibroblast growth factor | bFGF | 1:1,000 | #ET1703-18 | HUABIO |
| Angiopoietin-1 | ANGPT1 | 1:1,000 | #ET1611-28 | HUABIO |
| Inducible nitric oxide synthase | iNOS | 1:1,000 | #HA722031 | HUABIO |
| Tumor necrosis factor α | TNF-α | 1:1,000 | #HA722022 | HUABIO |
| Arginase-1 | ARG-1 | 1:2,000 | #HA721147 | HUABIO |
| Interleukin 17A | IL-17A | 1:500 | #ER1902-37 | HUABIO |
| Interleukin 10 | IL-10 | 1:1,000 | #HA722032 | HUABIO |
| Phospho-Erk1 (T202 + Y204) + Erk2 (T185 + Y187) | p-ERK1/2 | 1:5,000 | #ET1610-13 | HUABIO |
| Extracellular Signal-Regulated Kinase 1/2 | ERK1/2 | 1:5,000 | #ET1601-29 | HUABIO |
| Phospho-NF-kB p65 (S536) | p-NF-κB p65 | 1:5,000 | #HA723223 | HUABIO |
| Transcription factor NF kB | NF-κB p65 | 1:5,000 | #ET1603-12 | HUABIO |
| Phospho-Signal Transducer and Activator of Transcription 3 | p-STAT3 | 1:1,000 | #ET1607-39 | HUABIO |
| Signal Transducer and Activator of Transcription 3 | STAT3 | 1:1,000 | #ET1607-38 | HUABIO |
| β-Actin | β-actin | 1:50,000 | #HA722023 | HUABIO |
| Glyceraldehyde -3-phosphate dehydrogenase | GAPDH | 1:50,000 | #ET1601-4 | HUABIO |
| β-Tubulin | β-Tubulin | 1:20,000 | #ET1602-4 | HUABIO |

**Supplementary Table 2: Primary Antibodies Used for Immunohistochemistry**

| Antigen Name | Abbreviation | Dilution | Catalog Number | Manufacturers |
| --- | --- | --- | --- | --- |
| Cluster of Differentiation 86 | CD86 | 1:500 | #ET1606-50 | HUABIO |
| Cluster of Differentiation 206 | CD206 | 1:100 | #HA601453 | HUABIO |
| Cluster of Differentiation 68 | CD68 | 1:3,000 | #GB153109 | Servicebio |
| Cluster of Differentiation 163 | CD163 | 1:300 | #GB15340 | Servicebio |
| Vascular endothelial growth factor | VEGF | 1:100 | #ET1604-28 | HUABIO |
| Osterix | OSX | 1:500 | #HA722817 | HUABIO |

**Supplementary Table 3. Primers for RT-qPCR**

| **Gene Name** | **Species** | **Biological Role** | **GenBank Accession No.** | **Forward (5′- 3′) & Tm** | **Reverse (5′- 3′) & Tm** |
| --- | --- | --- | --- | --- | --- |
| **GAPDH** | *Mus musculus* | Housekeeping gene | NM_008084.3 | CATCACTGCCACCCAGAAGACTG (61.5 °C) | ATGCCAGTGAGCTTCCCGTTCAG (61.8 °C) |
| **Runx2** | *Mus musculus* | Osteogenesis | NM_009820.5 | GAACCAAGAAGGCACAGACAGAAG (60.3 °C) | GGCGGGACACCTACTCTCATAC (61.9 °C) |
| **ALP** | *Mus musculus* | Osteogenesis | NM_007431.3 | AACTGATGTGGAATACGAACTGGATG (60.6 °C) | CATAGTGGGAATGCTTGTGTCTGG (61.1 °C) |
| **OSX** | *Mus musculus* | Osteogenesis | NM_130458.3 | CTCTCTGCTTGAGGAAGAAG (57.3 °C) | GTCCATTGGTGCTTGAGAAG (58.4 °C) |
| **BMP2** | *Mus musculus* | Osteogenesis | NM_007553.3 | GCTGATCATCTGAACTCCACT (58.2 °C) | CGTCAAGGTACAGCATCGAGAT (59.8 °C) |
| **NFATc1** | *Mus musculus* | Osteoclastogenesis | NM_016791.4 | GACCCGGAGTTCGACTTCG (63.1 °C) | TGACACTAGGGGACACATAACTG (59.6 °C) |
| **CTSK** | *Mus musculus* | Osteoclastogenesis | NM_007799.3 | GAAGAAGACTCACCAGAAGCAG (59.3 °C) | TCCAGGTTATGGGCAGAGATT (57.1 °C) |
| **TRAP** | *Mus musculus* | Osteoclastogenesis | NM_007388.3 | CACTCCCACCCTGAGATTTGT (60.2 °C) | CATCGTCTGCACGGTTCTG (59.4 °C) |
| **c-Fos** | *Mus musculus* | Osteoclastogenesis | NM_010234.3 | CGGGTTTCAACGCCGACTA (61.0 °C) | TTGGCACTAGAGACGGACAGA (59.7 °C) |

**Supplementary Figure S1. *In vitro* release kinetics of MgTA@MnO₂ nanozymes.** Cumulative release profiles of **(A)** Mg²⁺, **(B)** TA, and **(C)** Mn²⁺ in physiological (pH 7.4) and simulated osteoporotic (pH 6.5 + 100 μM H₂O₂) microenvironments over 14 days. Data are presented as mean ± SD (n = 3).


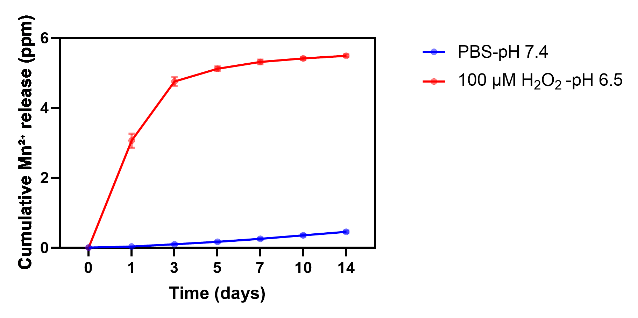

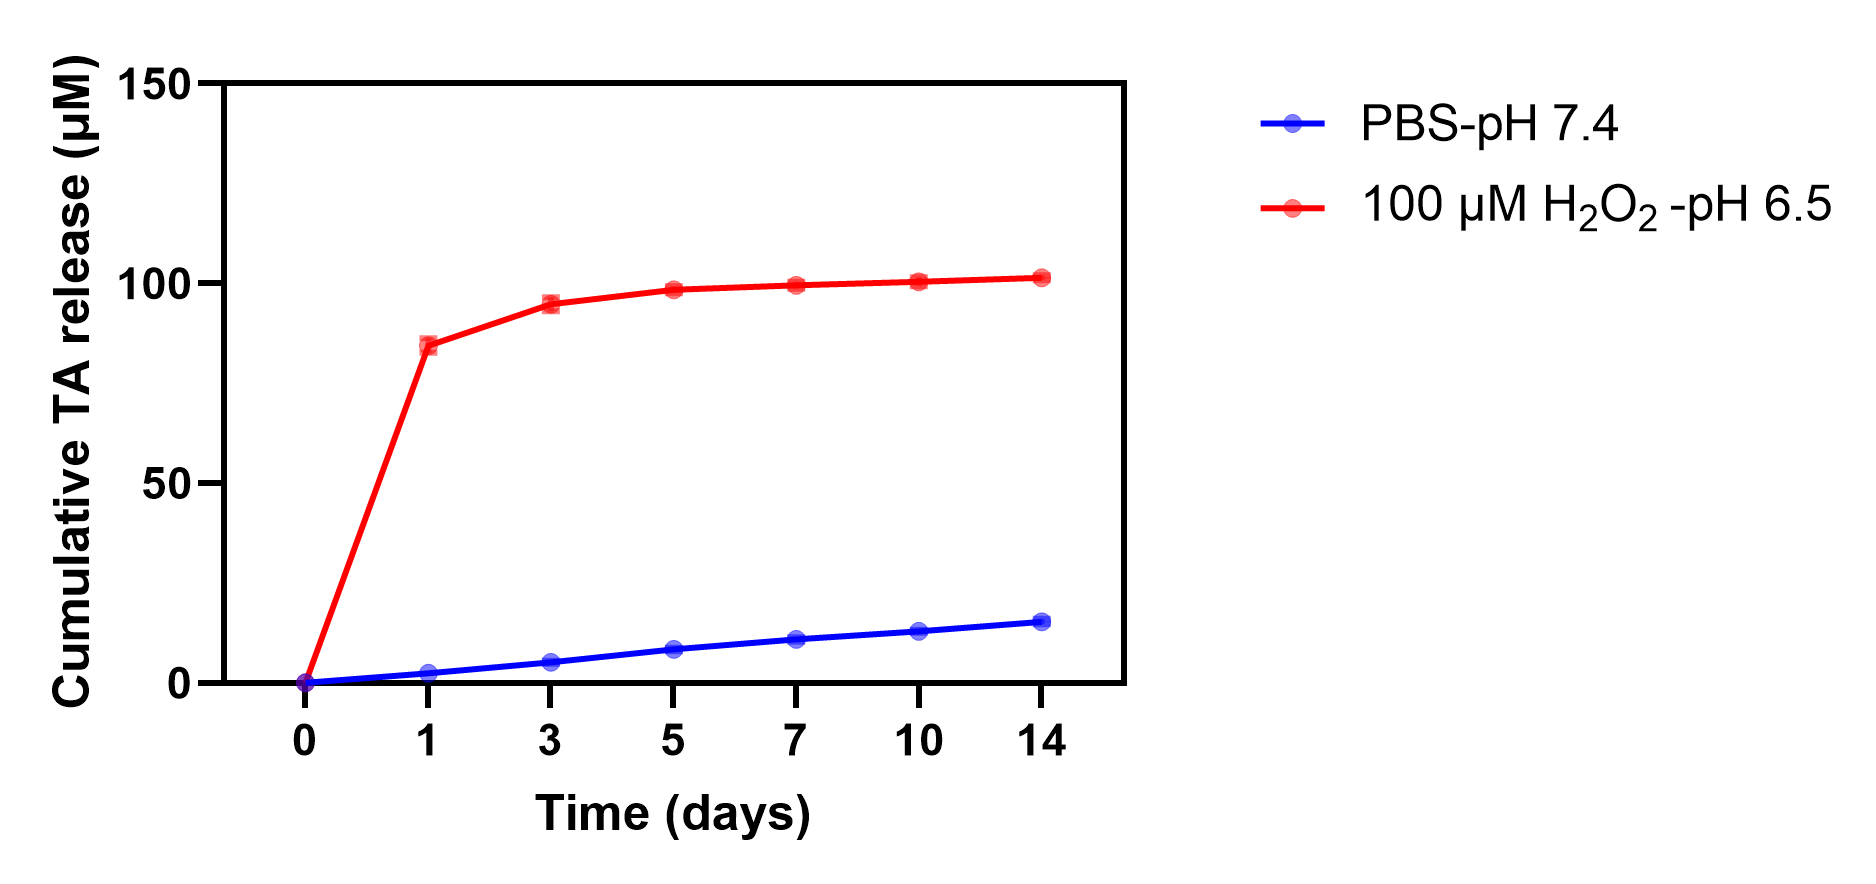

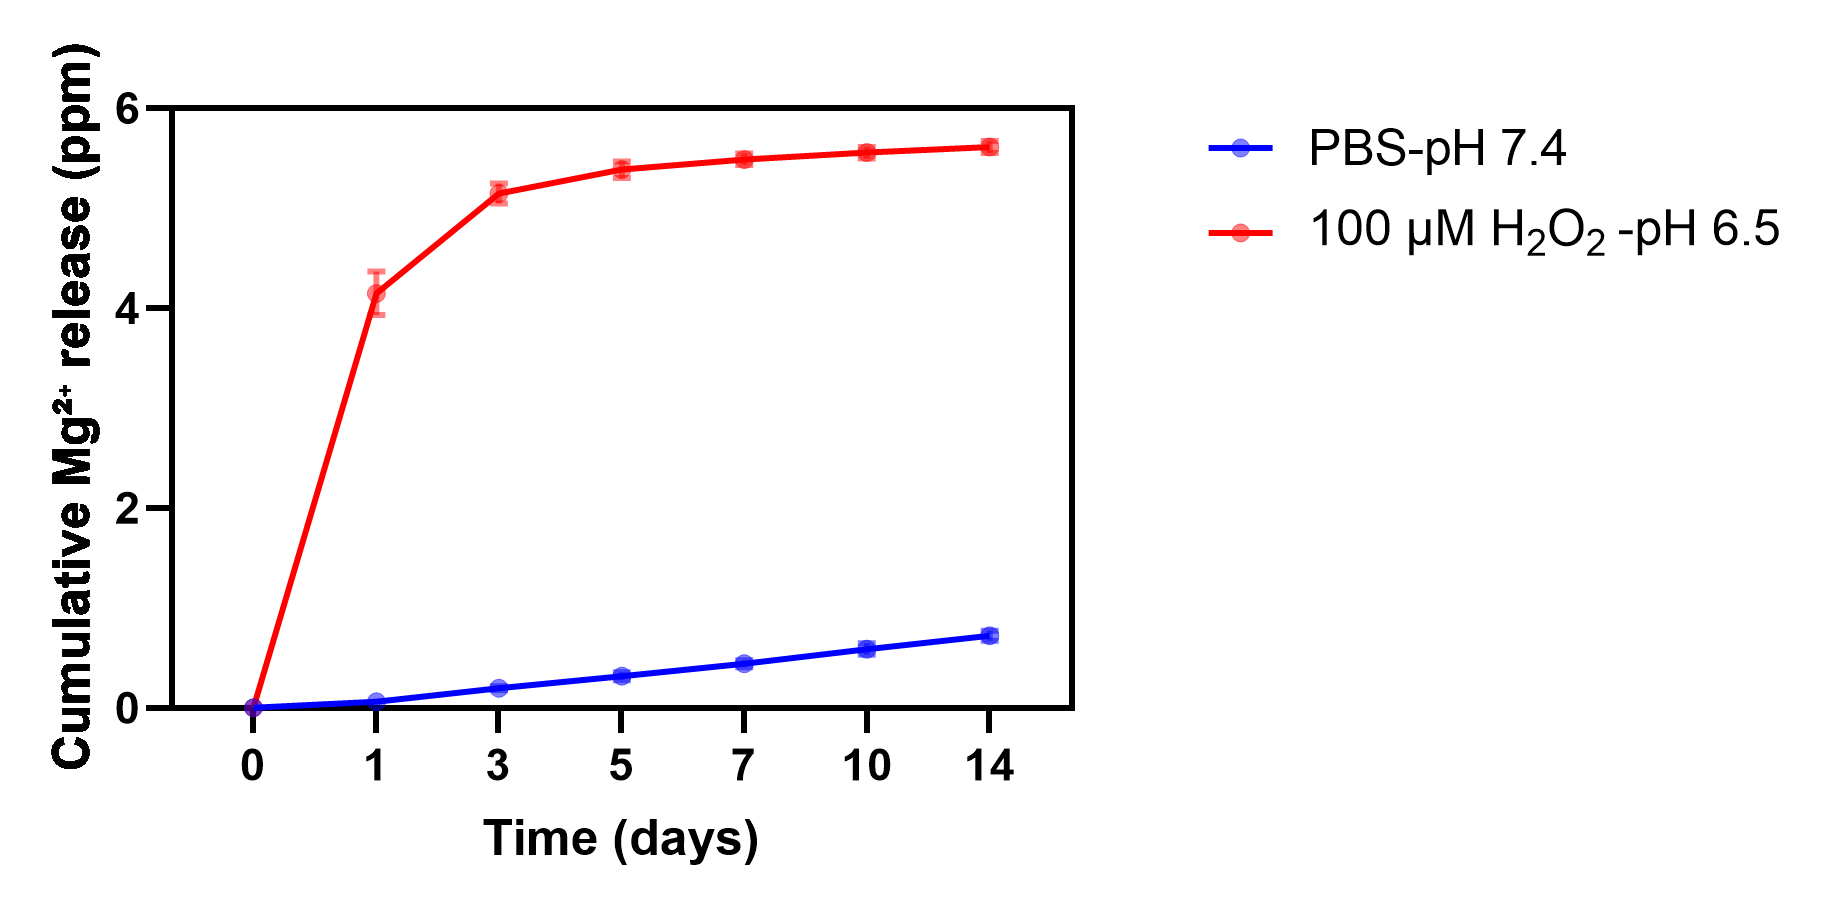


**A**

**B**

**C**
